# Supplementary material for: Gut microbiota dysbiosis contributes to the development of hypertension
Source: PubMed Central journal article supplement (PMC5286796; doi:10.1186/s40168-016-0222-x), 2017-02-01

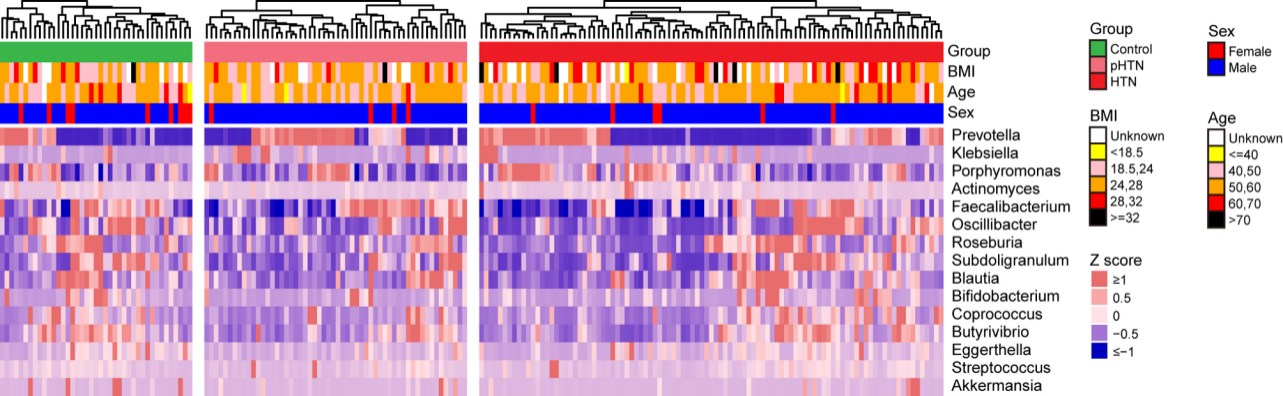

Supplement: 40168_2016_222_MOESM5_ESM.pdf [file 40168_2016_222_MOESM5_ESM.pdf]
